# Supplementary material for: Grain size modulates volcanic ash retention on crop foliage and potential yield loss
Source: Copernicus journal article supplement (doi:10.5194/nhess-23-1355-2023), 2023-04-11
Supplement: Supplementary file 1 [file Ligot_SEFY_SM_submission.docx]

**Supplementary Information**

**Grain size modulates volcanic ash retention on crop foliage and potential yield loss**

Ligot Noa1,*, Bogaert Patrick1, Biass Sébastien2, Lobet Guillaume3,4, Delmelle Pierre1

1Environmental Sciences, Earth and Life Institute, UCLouvain, Louvain-la-Neuve, Belgium

2Department of Earth Sciences, University of Geneva, Geneva, Switzerland

3Agricultural Sciences, Earth and Life Institute, UCLouvain, Louvain-la-Neuve, Belgium

4Agrosphere Institute, IBG3, Forschungszentrum Jülich, Jülich, Germany

*corresponding author

Email: noa.ligot@uclouvain.be

Tel.: +32 (0)10 473 638

NL ORCID: 0000-0003-1416-3663

**Material and methods**


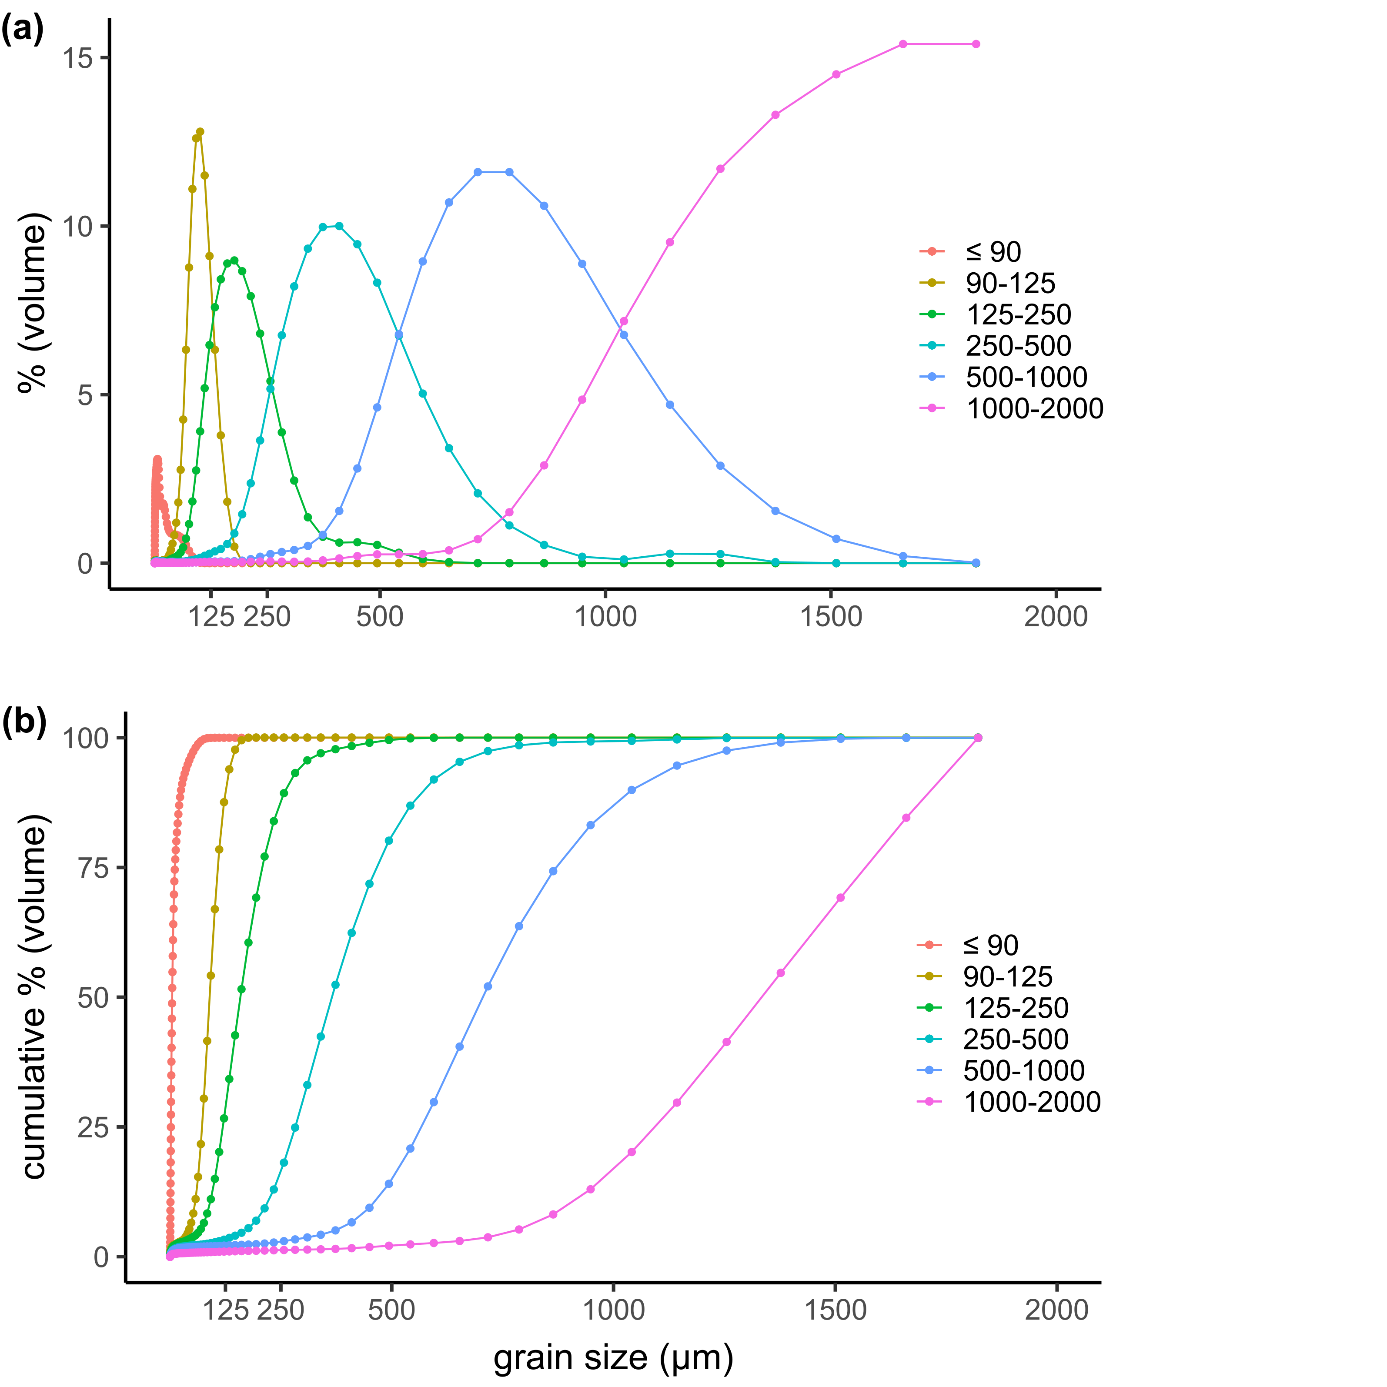


Figure S1: Grain size characteristics of the six ash size ranges (≤ 90, 90-125, 125-250, 250-500, 500-1000, 1000-2000 µm) used for simulating ash fall on tomato and chilli pepper plants: distributions (a) and cumulative distributions (b).


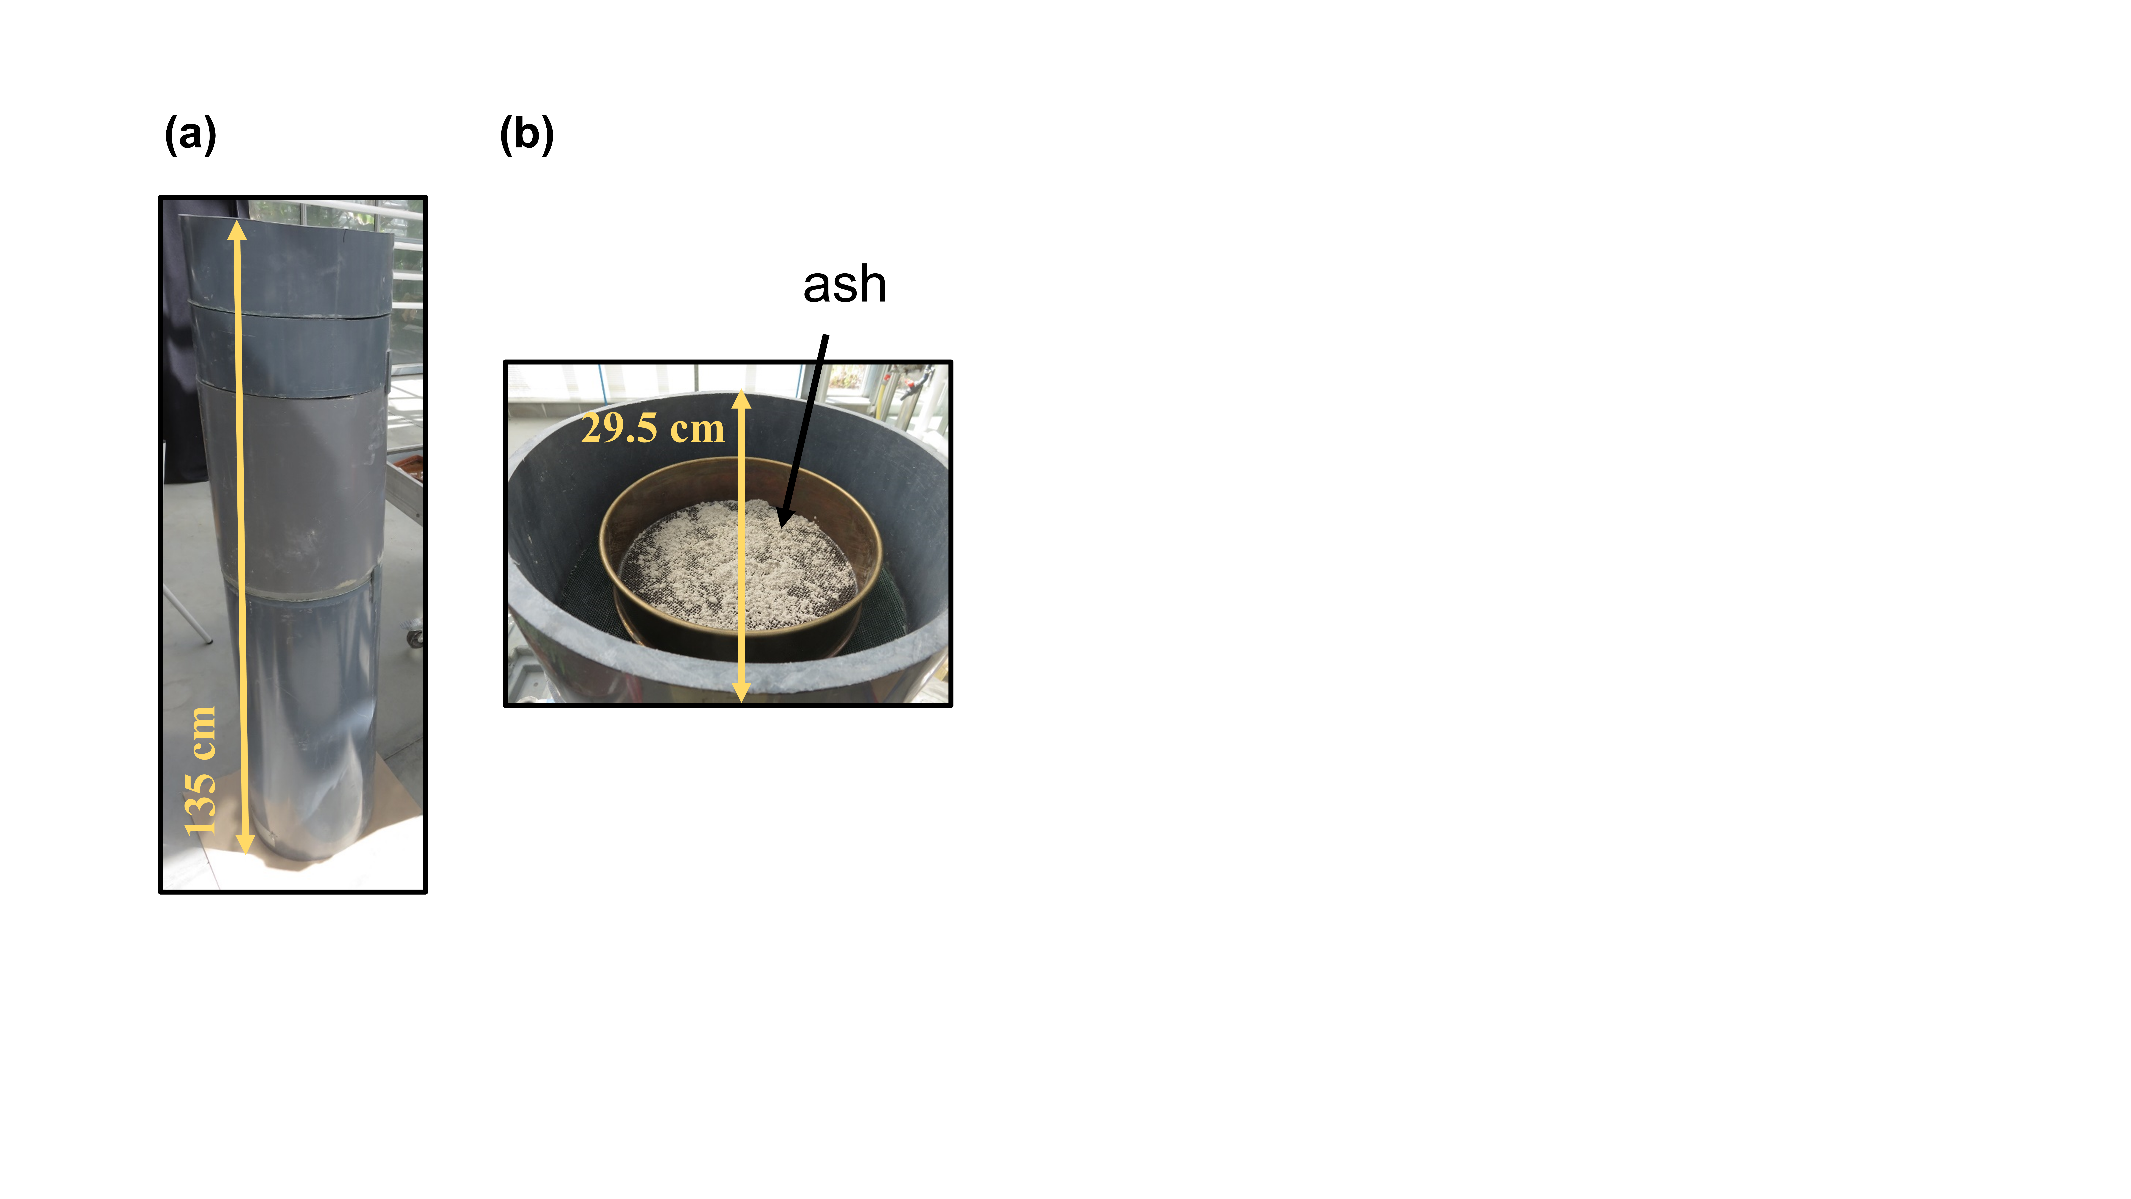


Figure S2: Photos of the ash fall simulator used to apply ash on tomato and chilli pepper plants. The device consists of *PVC* tube with three 1-mm opening meshes placed at 75, 110 and 120 cm from the tube base: side view (a) and top view with ash introduced through a 2- cm mesh sieve (b).

**Results**

Table S1: Summary statistics (mean, standard deviation (*sd*), minimum (*min*) and maximum (*max*) value, first (*q1*)and third (*q3*) quartile) of the percentage of foliar cover of tomato and chilli pepper plants coated with ash. The results are shown for the six ash grain size ranges tested in dry and wet conditions at leaf surfaces.

Table S2: Treatments significantly different according to the Tukey (*HSD*) test with the difference between group means and the associate adjusted *p*-value (*p.adj*). The test was performed to evaluate the effect of (i) humidity conditions at leaf surfaces for tomato and chilli pepper plants and (ii) crop type in dry leaf conditions on the percentage of foliar cover coated with ash. “125”, “250” and “500” stand for the 90-125, 125-250 and 250-500 µm ash size ranges, respectively.


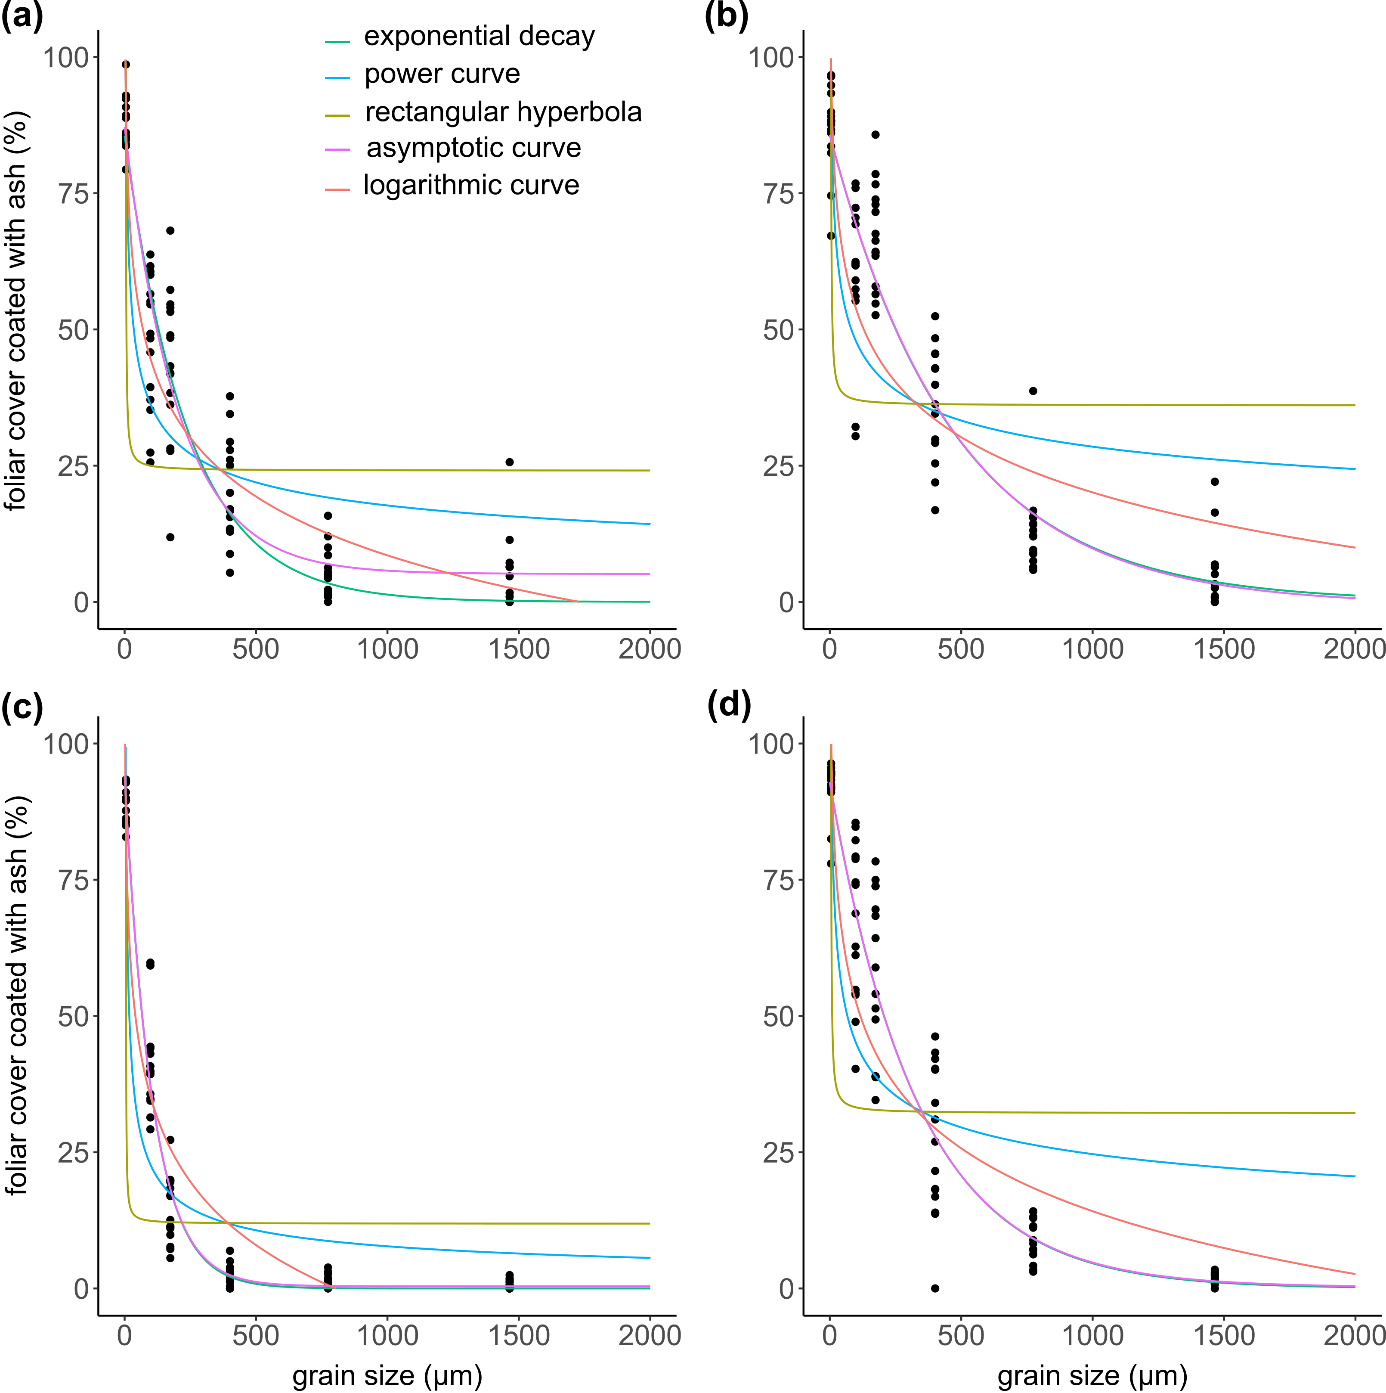


Figure S3: Fitting of the experimental datasets to represent the relationship between the percentage of foliar cover coated with ash and ash median grain size for tomato in dry (a) and wet (b) leaf conditions and chilli pepper in dry (c) and wet (d) leaf conditions. Five convex models were tested: exponential decay, power curve, rectangular hyperbola, asymptotic curve and logarithmic curve.

Table S3: Lack-of-fit analysis (F* statistics and corresponding *p*-values) of the five convex models (exponential decay, power curve, rectangular hyperbola, asymptotic curve and logarithmic curve) used to fit the four experimental datasets obtained by exposing tomato and chilli pepper in dry and wet leaf conditions to ash varying in grain size (see Fig. S3).


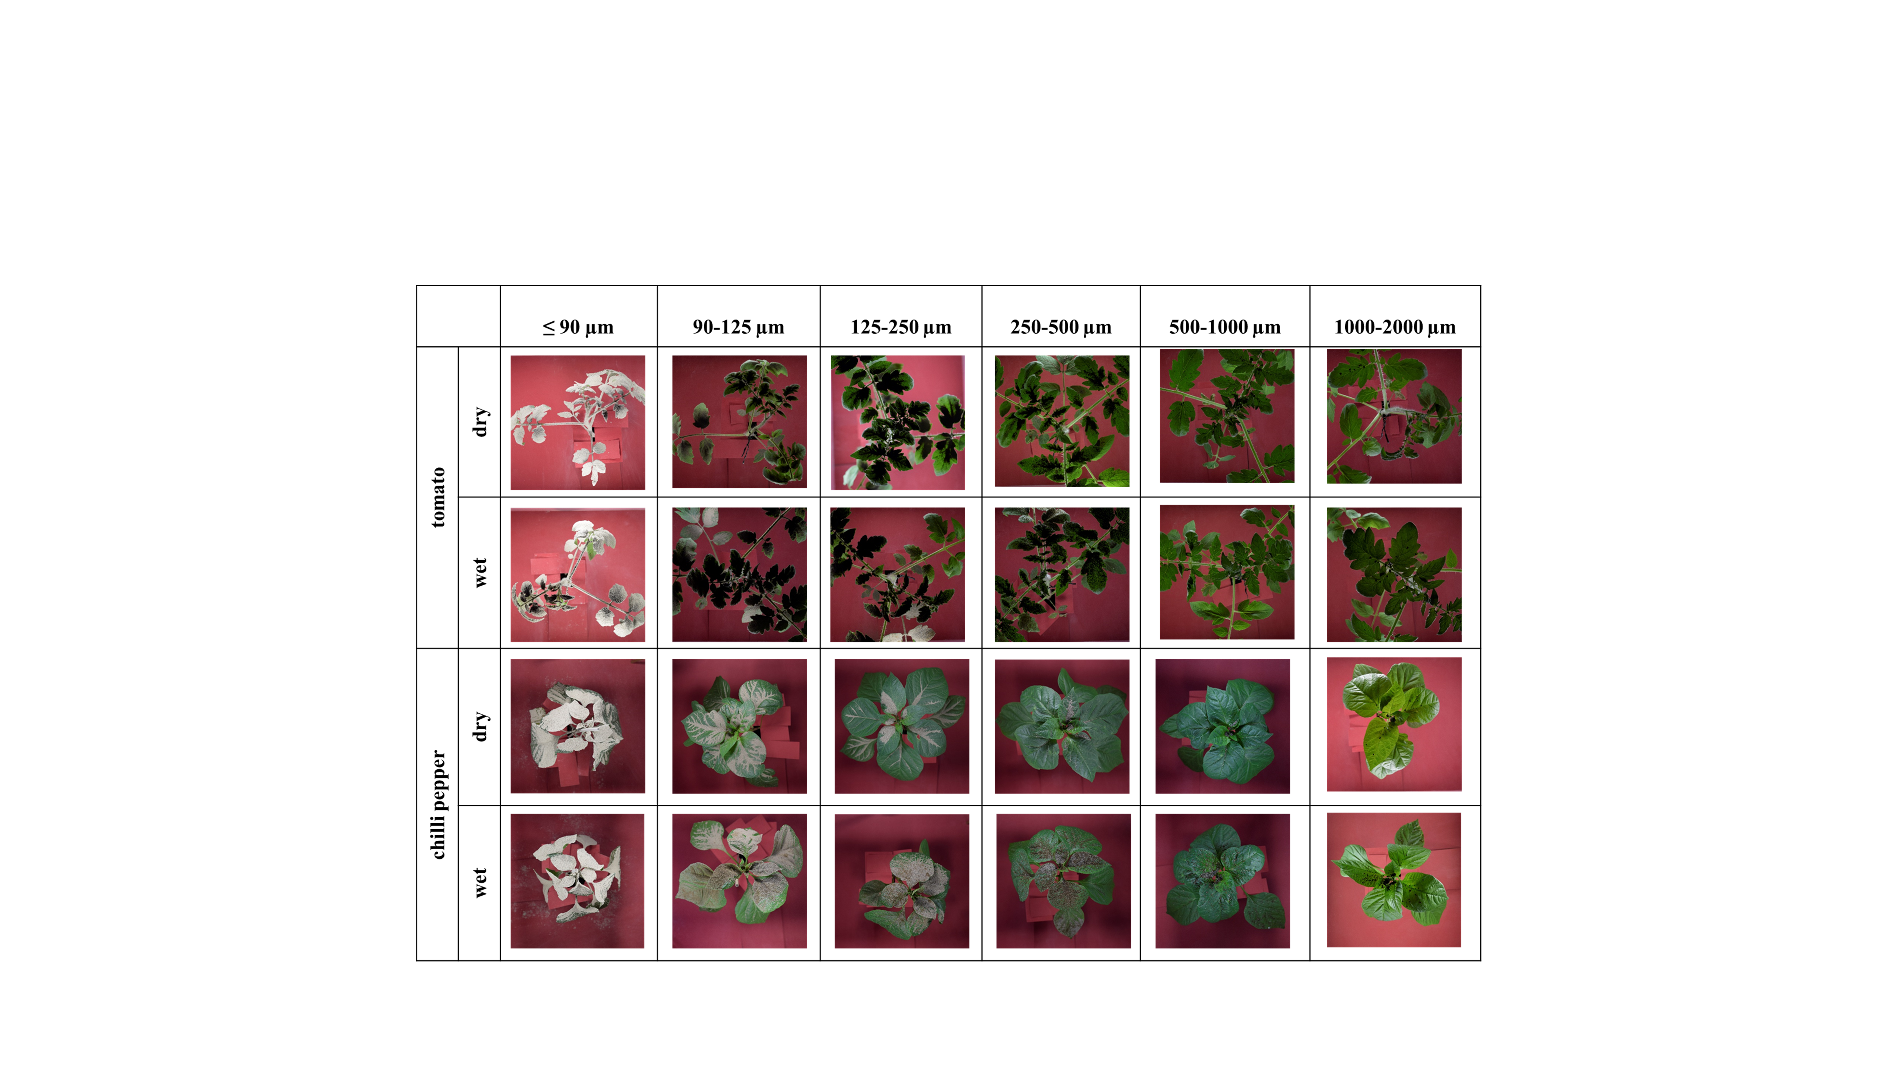


Figure S4: Photos of the tomato and chilli pepper plants after exposure to ash in dry and wet conditions at leaf surfaces. The columns correspond to the six ash size ranges tested (≤ 90, 90-125, 125-250, 250-500, 500-1000, 1000-2000 µm).

**Discussion**

Table S4: Terminal fall velocity of individual particles of 10, 100, 170, 410, 710 and 1470 µm as calculated using the drag model of Bagheri and Bonadonna (2016). The particles are non-spherical (flatness = 0.7, elongation = 0.7) and have a density of 2.54 g m-3.

Table S5: Parameter values used in the simulation of potential yield loss for tomato and chilli pepper plants exposed to ash. *k:* light interception coefficient; *Q:* incident radiation; *RUE:* radiation use efficiency; *CBP*: canopy partitioning factor; *ILAI*: proportion of *LAI* covered by ash and which does no operate photosynthesis; *DCB*: proportion of the biomass covered by ash which undergoes senescence; *TNL*: time needed for the plant to produce new leaves.


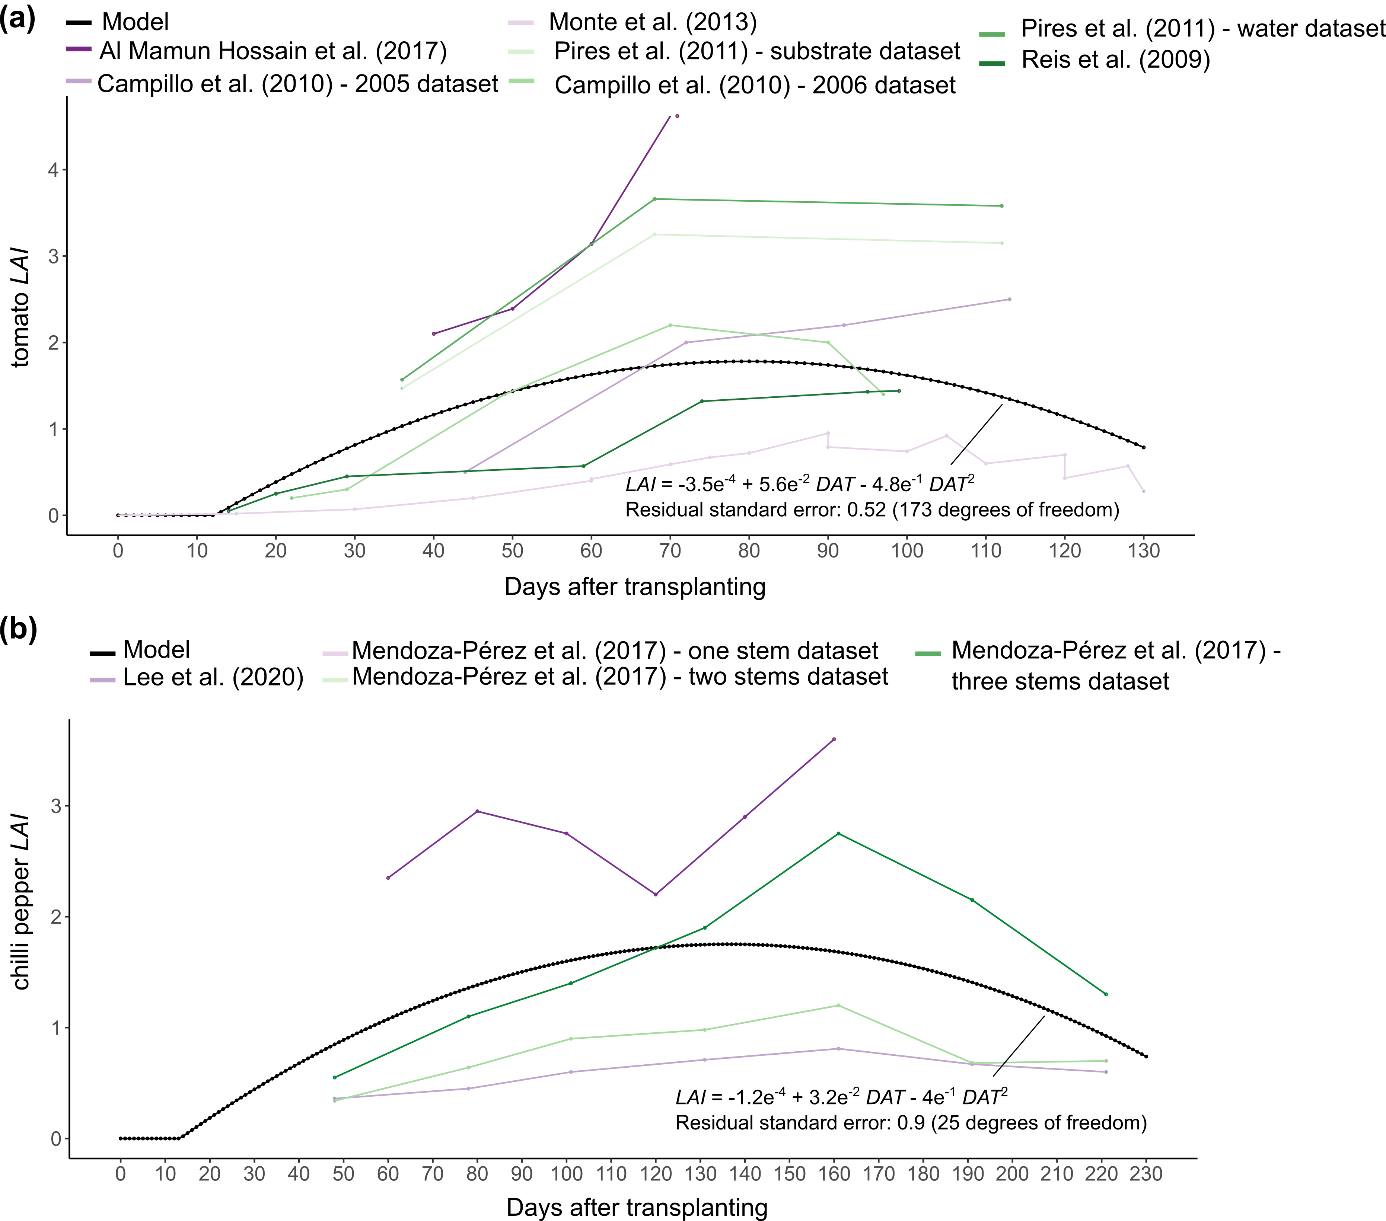


Figure S5: Temporal evolution of the leaf area index (*LAI*) for tomato (a) and chilli pepper (b) plants as modelled by fitting various datasets reported in the scientific literature. The *aomisc* package in *R* (Onofri, 2020) was used to obtain the best fit. Transplanting of tomato and chili pepper was assumed to take place 30 days after sowing. DAT refers to day after transplanting.


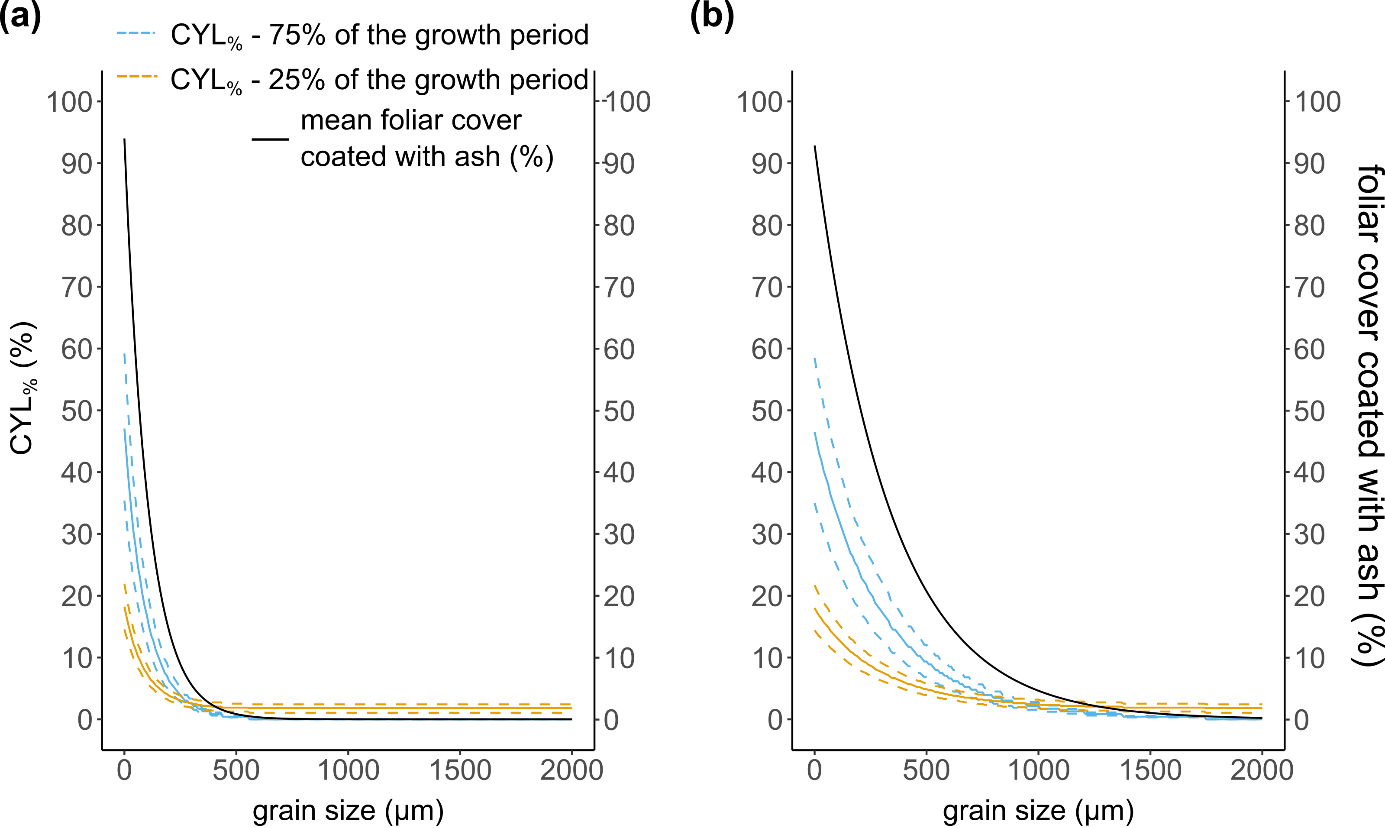


Figure S6: Potential crop yield loss (*CYL%*, first quartile, median and third quartile) estimated for chilli pepper plant as a function of ash grain size in dry (a) and wet (b) conditions at leaf surfaces.

**References**

Al Mamun Hossain, S. A., Lixue, W., Chen, T., and Li, Z.: Leaf area index assessment for tomato and cucumber growing period under different water treatments, Plant Soil Environ., 63, doi: 10.17221/568/2017-PSE, 2017.

Bagheri, G. and Bonadonna, C.: Chapter 2 - Aerodynamics of volcanic particles: characterization of size, shape, and settling velocity, in: Volcanic Ash, edited by: Mackie, S., Cashman, K., Ricketts, H., Rust, A., and Watson, M., Elsevier, 39-52, doi: 10.1016/B978-0-08-100405-0.00005-7, 2016.

Campillo, C., García, M. I., Daza, C., and Prieto, M. H.: Study of a non-destructive method for estimating the leaf area index in vegetable crops using digital images, Irrigation ScienceZoological ScienceHorticulture, Environment and Biotechnology, 45, 1459-1463, doi: 10.21273/hortsci.45.10.1459, 2010.

Farrokhi, E., Nassiri Mahallati, M., Koocheki, A., and Beheshti, S. A.: Light extinction coefficient and radiation use efficiency in different growth stages of tomato exposed to different irrigation regimes, Env. Stresses Crop Sci., 14, 629-648, doi: 10.22077/escs.2020.2960.1762, 2021.

Gallardo, M., Thompson, R. B., Giménez, C., Padilla, F. M., and Stöckle, C. O.: Prototype decision support system based on the VegSyst simulation model to calculate crop N and water requirements for tomato under plastic cover, Irrig. Sci., 32, 237-253, doi: 10.1007/s00271-014-0427-3, 2014.

Higashide, T., Yasuba, K.-i., Suzuki, K., Nakano, A., and Ohmori, H.: Yield of japanese tomato cultivars has been hampered by a breeding focus on flavor, HortScience, 47, 1408-1411, doi: 10.21273/hortsci.47.10.1408, 2012.

Karam, F., Masaad, R., Bachour, R., Rhayem, C., and Rouphael, Y.: Water and radiation use efficiencies in drip-irrigated pepper (Capsicum annuum L.): Response to full and deficit irrigation regimes, Eur. J. Hortic. Sci., 74, 79-85, 2009.

Lee, J. W., Kang, W. H., Moon, T., Hwang, I., Kim, D., and Son, J. E.: Estimating the leaf area index of bell peppers according to growth stage using ray-tracing simulation and a long short-term memory algorithm, Hortic. Environ. Biotechnol., 61, 255-265, doi: 10.1007/s13580-019-00214-9, 2020.

Martínez-Ruiz, A., Lopez-Cruz, I., Ruiz Garcia, A., Pineda, J., and prado hernández, J.: HortSyst: A dynamic model to predict growth, nitrogen uptake, and transpiration of greenhouse tomatoes, Chil. J. Agric. Res., 79, 89-102, doi: 10.4067/S0718-58392019000100089, 2019.

Mendoza Perez, C., Ojeda, W., Carlos, R., and Flores, H.: Estimation of leaf area index and yield of greenhouse-grown poblano pepper, Ing. agric. biosist., 9, 37-50, doi: 10.5154/r.inagbi.2017.04.009, 2017.

Monte, J. A., de Carvalho, D. F., Medici, L. O., da Silva, L. D. B., and Pimentel, C.: Growth analysis and yield of tomato crop under different irrigation depths, Rev. Bras. de Eng. Agricola e Ambient., 17, 926 – 931, doi: 10.1590/S1415-43662013000900003, 2013.

The broken bridge between biologists and statisticians: A blog and R package: <https://github.com/OnofriAndreaPG/aomisc>, last access: 02 of February.

Pires, R. C. d. M., Furlani, P. R., Ribeiro, R. V., Junior, D. B., Sakai, E., Lourenção, A. L., and Neto, A. T.: Irrigation frequency and substrate volume effects in the growth and yield of tomato plants under greenhouse conditions, Crop Sci., 68, doi: 10.1590/S0103-90162011000400002, 2011.

Reis, L., De Souza, J., and Azevedo, C.: Evapotranspiração e coeficiente de cultivo do tomate caqui cultivado em ambiente protegido, Rev. Bras. de Eng. Agricola e Ambient., 13, doi: 10.1590/S1415-43662009000300010, 2009.

Solar resource maps of Belgium: <https://solargis.com/maps-and-gis-data/download/belgium>, last access: 17 of March.

Surmaini, E., Hidayati, R., and Triwidiatno: Extinction coefficient and production of bushy pepper at several radiation levels, Indonesian Soil and Climate Journal, 18, doi: 10.2017/jti.v0n18.2000.%p, 2000.

Ta, H., Shin, J. H., Ahn, T. I., and Son, J. E.: Modeling of transpiration of paprika (Capsicum annuum L.) plants based on radiation and leaf area index in soilless culture, Hortic. Environ. Biotechnol., 52, 265-269, doi: 10.1007/s13580-011-0216-3, 2011.

Yildirim, M., Demirel, K., and Bahar, E.: Radiation use efficiency and yield of pepper (Capsicum annuum L. cv. California Wonder) under different irrigation treatments, J. Agric. Sci. Technol, 19, 693-705, 2017.
