# Supplementary material for: Grain size modulates volcanic ash retention on crop foliage and potential yield loss
Source: Copernicus journal article supplement (doi:10.5194/nhess-23-1355-2023), 2023-04-11
Supplement: Supplementary file 2 [file Supplementary material_Ligot.xlsx]

## Sheet: S3
Ash impact on CBIOh is modulated by different factors, including the LAI fraction that becomes photosynthetically inactive due to the presence of ash coatings on leaves (i), number of days elapsed between ash deposition and emergence of new leaves (ii), leaf-to-canopy biomass ratio (iii), and percentage of leaf biomass covered by ash and which eventually dies (iv). In order to assess the error on…
tomato, day 32					tomato, day 97					chilli, day 57					chilli day 172
parameter variation	parameter value	estimated yield loss	yield loss difference	yield loss difference (%)	parameter variation	parameter value	estimated yield loss	yield loss difference	yield loss difference (%)	parameter variation	parameter value	estimated yield loss	yield loss difference	yield loss difference (%)	parameter variation	parameter value	estimated yield loss	yield loss difference	yield loss difference (%)
canopy biomass partitioning					canopy biomass partitioning					canopy biomass partitioning					canopy biomass partitioning
0	0.6	16.3	0	0	0	0.6	47.46	0	0	0	0.6	17.2	0	0	0	0.6	46.67	0	0
0.01	0.606	16.33	-0.03	-0.184049	0.01	0.606	47.83	-0.37	-0.779604	0.01	0.606	17.26	-0.06	-0.348837	0.01	0.606	47.05	-0.38	-0.814228
0.05	0.63	16.47	-0.17	-1.04294	0.05	0.63	49.3	-1.84	-3.87695	0.05	0.63	17.48	-0.28	-1.62791	0.05	0.63	48.57	-1.9	-4.07114
0.1	0.66	16.64	-0.34	-2.08589	0.1	0.66	51.14	-3.68	-7.7539	0.1	0.66	17.76	-0.56	-3.25581	0.1	0.66	50.47	-3.8	-8.14228
0.5	0.9	17.98	-1.68	-10.3067	0.5	0.9	65.83	-18.37	-38.7063	0.5	0.9	19.97	-2.77	-16.1047	0.5	0.9	65.65	-18.98	-40.6685
-0.01	0.594	16.27	0.03	0.184049	-0.01	0.594	47.09	0.37	0.779604	-0.01	0.594	17.15	0.05	0.290698	-0.01	0.594	46.29	0.38	0.814228
-0.05	0.57	16.13	0.17	1.04294	-0.05	0.57	45.62	1.84	3.87695	-0.05	0.57	16.93	0.27	1.56977	-0.05	0.57	44.78	1.89	4.04971
-0.1	0.54	15.96	0.34	2.08589	-0.1	0.54	43.79	3.67	7.73283	-0.1	0.54	16.65	0.55	3.19767	-0.1	0.54	42.88	3.79	8.12085
-0.5	0.3	14.62	1.68	10.3067	-0.5	0.3	29.09	18.37	38.7063	-0.5	0.3	14.44	2.76	16.0465	-0.5	0.3	27.69	18.98	40.6685
-0.9	0.06	13.27	3.03	18.589	-0.9	0.06	14.39	33.07	69.6797	-0.9	0.06	12.23	4.97	28.8953	-0.9	0.06	12.51	34.16	73.1948
days before new leaves					days before new leaves					days before new leaves					days before new leaves
0	0	16.3	0	0	0	13	47.46	0	0	0	14	17.2	0	0	0	14	46.67	0	0
1	1	17.27	-0.97	-5.95092	0.05	14	48.08	-0.62	-1.30636	0.05	15	17.7	-0.5	-2.90698	0.05	15	47	-0.33	-0.707092
2	2	18.25	-1.95	-11.9632	0.2	16	48.68	-1.22	-2.57059	0.2	17	18.19	-0.99	-5.75581	0.2	17	47.33	-0.66	-1.41418
5	5	21.16	-4.86	-29.816	0.5	20	50.45	-2.99	-6.30004	0.5	21	19.66	-2.46	-14.3023	0.5	21	48.29	-1.62	-3.47118
10	10	25.98	-9.68	-59.3865	0.9	25	53.21	-5.75	-12.1155	0.9	27	22.11	-4.91	-28.5465	0.9	27	49.85	-3.18	-6.8138
20	20	35.45	-19.15	-117.485	-0.05	12	57.95	-10.49	-22.1028	-0.05	13	26.96	-9.76	-56.7442	-0.05	13	52.76	-6.09	-13.0491
30	30	44.62	-28.32	-173.742	-0.2	10	60.81	-13.35	-28.129	-0.2	11	31.77	-14.57	-84.7093	-0.2	11	55.39	-8.72	-18.6844
proportion of cover LAI photosynthetically inactive					proportion of cover LAI photosynthetically inactive					proportion of cover LAI photosynthetically inactive					proportion of cover LAI photosynthetically inactive
0	1	16.3	0	0	0	1	47.46	0	0	0	1	17.2	0	0	0	1	46.67	0	0
-0.01	0.99	16.29	0.01	0.0613497	-0.01	0.99	47.45	0.01	0.0210704	-0.01	0.99	17.2	0	0	-0.01	0.99	46.33	0.34	0.728519
-0.05	0.95	15.28	1.02	6.25767	-0.05	0.95	46.17	1.29	2.71808	-0.05	0.95	16.69	0.51	2.96512	-0.05	0.95	45.67	1	2.1427
-0.1	0.9	14.3	2	12.2699	-0.1	0.9	45.55	1.91	4.02444	-0.1	0.9	15.74	1.46	8.48837	-0.1	0.9	44.77	1.9	4.07114
-0.5	0.5	9.21	7.09	43.4969	-0.5	0.5	39.81	7.65	16.1188	-0.5	0.5	10.42	6.78	39.4186	-0.5	0.5	40.07	6.6	14.1418
-0.9	0.1	4.81	11.49	70.4908	-0.9	0.1	36.96	10.5	22.1239	-0.9	0.1	6.54	10.66	61.9767	-0.9	0.1	38.08	8.59	18.4058
proportion of covered leaf biomass dying					proportion of covered leaf biomass dying					proportion of covered leaf biomass dying					proportion of covered leaf biomass dying
0	1	16.3	0	0	0	1	47.46	0	0	0	1	17.2	0	0	0	1	46.67	0	0
-0.01	0.99	16.27	0.03	0.184049	-0.01	0.99	47.09	0.37	0.779604	-0.01	0.99	17.15	0.05	0.290698	-0.01	0.99	46.29	0.38	0.814228
-0.05	0.95	16.13	0.17	1.04294	-0.05	0.95	45.62	1.84	3.87695	-0.05	0.95	16.93	0.27	1.56977	-0.05	0.95	44.78	1.89	4.04971
-0.1	0.9	15.96	0.34	2.08589	-0.1	0.9	43.79	3.67	7.73283	-0.1	0.9	16.65	0.55	3.19767	-0.1	0.9	42.88	3.79	8.12085
-0.5	0.5	14.62	1.68	10.3067	-0.5	0.5	29.09	18.37	38.7063	-0.5	0.5	14.44	2.76	16.0465	-0.5	0.5	27.69	18.98	40.6685
-0.9	0.1	13.27	3.03	18.589	-0.9	0.1	14.39	33.07	69.6797	-0.9	0.1	12.23	4.97	28.8953	-0.9	0.1	12.51	34.16	73.1948
