# Supplementary material for: Grain size modulates volcanic ash retention on crop foliage and potential yield loss
Source: Copernicus journal article supplement (doi:10.5194/nhess-23-1355-2023), 2023-04-11
Supplement: Supplementary file [file nhess-23-1355-2023-supplement-title-page.pdf › nhess-23-1355-2023-supplement-title-page.pdf]

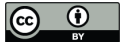

*Supplement of*

**Grain size modulates volcanic ash retention on crop foliage and potential yield loss**

**Noa Ligot et al.**

*Correspondence to:* Noa Ligot ([noa.ligot@uclouvain.be](mailto:noa.ligot@uclouvain.be))

- [nhess-23-1355-2023-supplement-title-page.pdf](#)
- Supplementary materials Ligot SEFY
  - [Ligot\\_SEFY\\_SM\\_submission.docx](#)
  - [Supplementary material\\_Ligot.xlsx](#)

The copyright of individual parts of the supplement might differ from the article licence.
